# Supplementary material
Source: HighWire-hosted journal article supplement (https://rmdopen.bmj.com/content/9/1/e002936)
Supplement: inline-supplementary-material-1 [file inline-supplementary-material-1.pdf]

**Supplementary Table 1.** Effects of patient characteristics and targeted therapy on baseline DAS28 and on the annual rate of change in DAS28 pre- and post-COVID-19 vaccination in RA patients\*

|                                              | Effects on baseline DAS28, points |         | Effects on annual rate of change in DAS28, points/year |         |                  |         |
|----------------------------------------------|-----------------------------------|---------|--------------------------------------------------------|---------|------------------|---------|
|                                              |                                   | P value | Pre-vaccination                                        | P value | Post-vaccination | P value |
| Intercept                                    | 2.611 ± 0.208                     | <0.001  | -0.049 ± 0.042                                         | 0.245   | -0.742 ± 1.016   | 0.465   |
| Gender (Ref. woman)                          | -0.356 ± 0.097                    | <0.001  | -0.020 ± 0.019                                         | 0.291   | 1.083 ± 0.466    | 0.020   |
| Age at vaccination (per year)                | 0.010 ± 0.003                     | 0.003   | 0.001 ± 0.001                                          | 0.167   | 0.001 ± 0.016    | 0.932   |
| Targeted therapy at vaccination (Ref. TNF-i) |                                   |         |                                                        |         |                  |         |
| Anti-B cells                                 | -0.212 ± 0.113                    | 0.061   | -0.081 ± 0.023                                         | <0.001  | -0.452 ± 0.640   | 0.480   |
| IL-6-i                                       | -0.353 ± 0.092                    | <0.001  | -0.039 ± 0.019                                         | 0.039   | 1.201 ± 0.550    | 0.029   |
| T cell coestimulation-i                      | -0.038 ± 0.108                    | 0.726   | -0.124 ± 0.031                                         | <0.001  | 0.907 ± 0.564    | 0.108   |
| JAK-i                                        | -0.136 ± 0.109                    | 0.212   | -0.350 ± 0.059                                         | <0.001  | 1.436 ± 0.531    | 0.007   |
| Others                                       | 0.343 ± 0.511                     | 0.502   | 0.050 ± 0.174                                          | 0.775   | -0.548 ± 2.684   | 0.838   |

\*Plus-minus values represent means ± SE

IL-6-i: Interleukin-6 inhibitors; JAK-i: Janus kinase inhibitor; SE: standard error; T cell coestimulation-i: T cell coestimulation inhibitor; TNF-i: tumor necrosis factor inhibitors.
